# Supplementary material for: Mitochondrial regulator PGC-1a in neuronal metabolism and brain aging
Source: PubMed Central journal article supplement (PMC10557769; doi:10.1101/2023.09.29.559526), 2023-09-29

**A**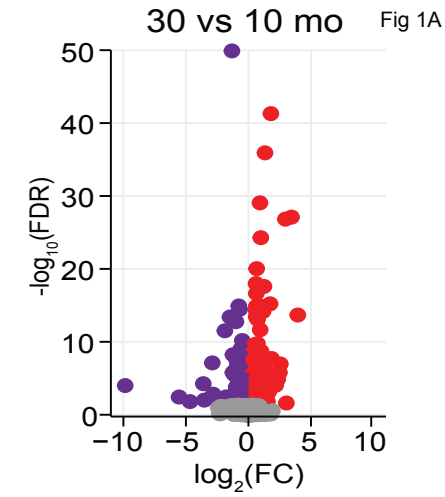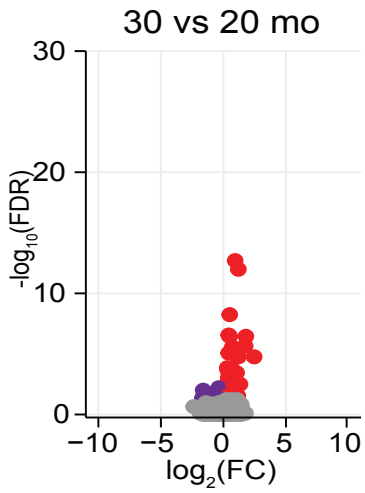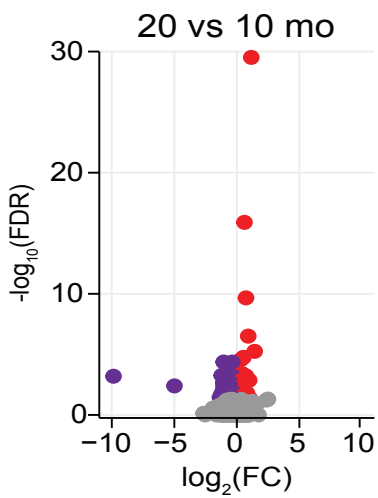**B****30 v 10**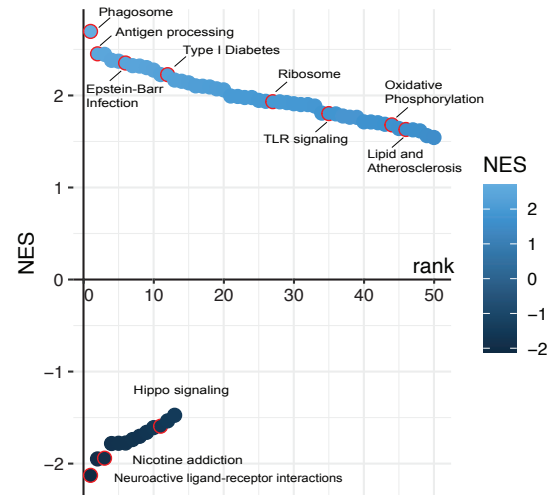**30 v 20**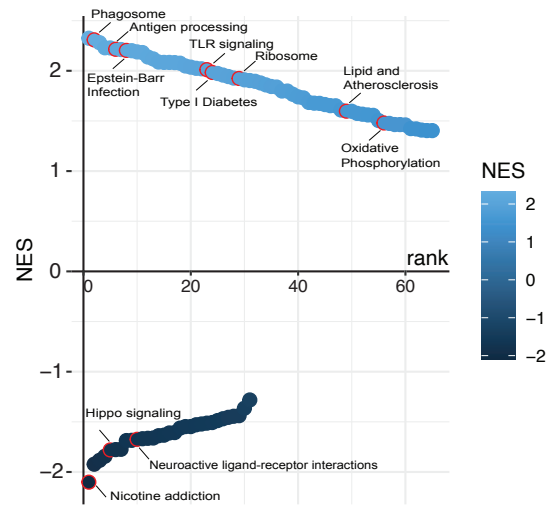**20 v 10**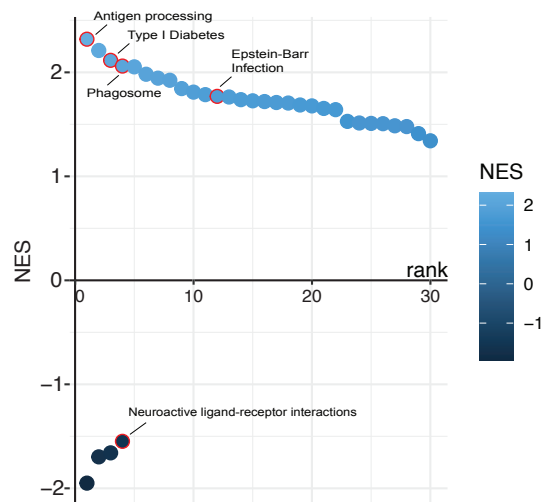

Supplement: media-2.pdf [file media-2.pdf]
