# Supplementary material for: Mitochondrial regulator PGC-1a in neuronal metabolism and brain aging
Source: PubMed Central journal article supplement (PMC10557769; doi:10.1101/2023.09.29.559526), 2023-09-29

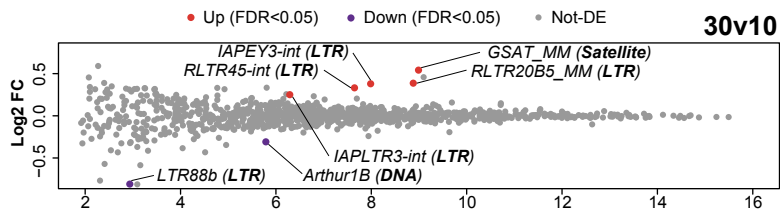

Fig 1D

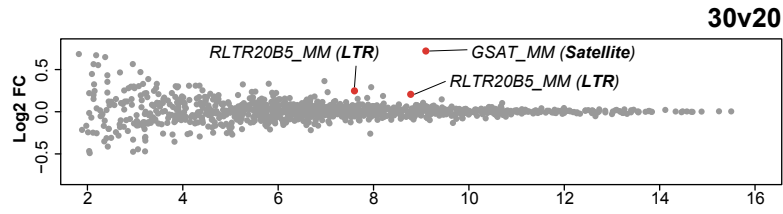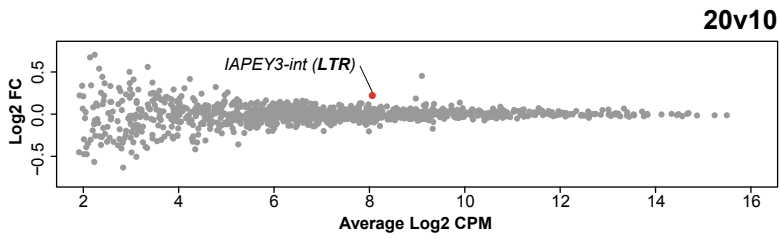

Supplement: media-3.pdf [file media-3.pdf]
